# Supplementary material
Source: ML conference proceedings conference paper supplement (https://openreview.net/forum?id=ENMl53MpKm)
Supplement: supplementary_material [file attachment]

# Supplementary Materials: Rethinking the Effect of Uninformative Class Name in Prompt Learning

Fengmao Lv  
Southwest Jiaotong University  
Chengdu, China  
fengmaolv@swjtu.edu.cn

Changru Nie  
Southwest Jiaotong University  
Chengdu, China  
niechangru@my.swjtu.edu.cn

Jianyang Zhang\*  
University of Electronic Science and  
Technology of China  
Chengdu, China  
jianyangzhang@std.uestc.edu.cn

Guowu Yang  
University of Electronic Science and  
Technology of China  
Chengdu, China  
guowu@uestc.edu.cn

Guosheng Lin  
Nanyang Technological University  
Singapore, Singapore  
gslin@ntu.edu.sg

Xiao Wu  
Southwest Jiaotong University  
Chengdu, China  
wuxiaohk@swjtu.edu.cn

Tianrui Li  
Southwest Jiaotong University  
Chengdu, China  
trli@swjtu.edu.cn

## A Additional Result Comparisons

In order to further verify the applicability and the effectiveness of IDAPL, we conduct additional comparison studies with the very recent prompt learning approach CoPrompt [3]. CoPrompt significantly improves the generalization ability of prompt learning paradigm by learning the consistency of the language and image branches with the GPT-generated class descriptions and the augmented images, respectively. Notably, for fair comparisons, we set  $\alpha = 0.1$  &  $\beta = 5$  as the same as implementing IDAPL under the CoOp and MaPLe baselines. The rest hyper-parameter settings follow the original implementation of CoPrompt. In addition, the results of CoPrompt are implemented based on its official open source code. The results are shown in Table A1. We can see that IDAPL achieves performance improvements on 7 of 11 datasets on both the base and novel classes, with improvements on 8 of 11 datasets on the harmonic mean of accuracies on base and novel classes. These results further verify the effectiveness of IDAPL and the broad applicability of IDAPL on existing prompt learning approaches.

## B Comparing with GPT enhanced baselines

To further validate the improvements of our approach, we conduct additional comparison studies with GPT enhanced baseline models under the base-to-novel setting. Specifically, we combine GPT generated class descriptions collected by Maniparambil et al. [2] with baseline model CoOp [4] and MaPLe [1] following our implementation introduced in Section 3.2. The comparison results are shown in Table A2. It is clear that, in general, our approach can achieve better performances in both base and novel classes. Specifically, comparing with directly combining GPT descriptions with CoOp, applying our IDAPL approach into the training paradigm of CoOp achieves better performances on 8 out of 11 datasets for base classes and 9 out of 11 datasets for novel classes. Moreover, comparing with combining GPT descriptions with MaPLe, applying our IDAPL

**Table A1: Comparison with CoPrompt on the base-to-novel generalization setting. H indicates the harmonic mean of accuracies on base and novel categories.**

|              | CoPrompt    |             |             | CoPrompt+IDAPL |             |             |
|--------------|-------------|-------------|-------------|----------------|-------------|-------------|
|              | Base        | Novel       | H           | Base           | Novel       | H           |
| Average      | 83.0        | 74.7        | 78.6        | <b>84.2</b>    | <b>76.3</b> | <b>80.1</b> |
| ImageNet     | 76.5        | <b>71.3</b> | 73.8        | <b>77.0</b>    | 71.2        | <b>74.0</b> |
| FGVCAircraft | 35.7        | 33.8        | 34.7        | <b>44.0</b>    | <b>36.7</b> | <b>40.0</b> |
| Food101      | <b>90.5</b> | 91.5        | <b>91.0</b> | 89.7           | <b>91.8</b> | 90.7        |
| Caltech101   | 98.6        | <b>95.4</b> | <b>97.0</b> | <b>99.1</b>    | 94.5        | 96.8        |
| Flowers102   | 96.9        | 74.6        | 84.3        | <b>97.1</b>    | <b>74.8</b> | <b>84.5</b> |
| OxfordPets   | <b>96.4</b> | <b>97.7</b> | <b>97.0</b> | 95.0           | 96.9        | 95.9        |
| StanfordCars | 72.6        | 69.3        | 70.9        | <b>78.4</b>    | <b>73.1</b> | <b>75.6</b> |
| SUN397       | 82.5        | <b>79.8</b> | 81.1        | <b>83.5</b>    | <b>79.8</b> | <b>81.6</b> |
| DTD          | <b>83.9</b> | 58.5        | 68.9        | 83.0           | <b>62.2</b> | <b>71.1</b> |
| EuroSAT      | 93.5        | 71.3        | 80.9        | <b>94.2</b>    | <b>79.2</b> | <b>86.0</b> |
| UCF101       | <b>85.9</b> | 78.4        | 82.0        | <b>85.9</b>    | <b>78.6</b> | <b>82.1</b> |

approach into MaPLe achieves better performances on 8 out of 11 datasets and equivalent performances on 2 of 11 datasets for base classes, as well as better performances on 7 out of 11 datasets and equivalent performances on 1 out of 11 datasets for novel classes. These performance benefits clearly verify the effectiveness of our approach, and that the improvement achieved by IDAPL doesn't solely come from the usage of GPT.

\*Corresponding author.

**Table A2: Comparison with GPT enhanced baseline models on the base-to-novel generalization setting. H indicates the harmonic mean of accuracies on base and novel categories. The blue texts indicate the performance differences between our approach and directly combing GPT descriptions with baseline models.**

| (a) Average over 11 datasets |      |       |      | (b) ImageNet     |      |       |      | (c) FGVC Aircraft |      |       |      |
|------------------------------|------|-------|------|------------------|------|-------|------|-------------------|------|-------|------|
|                              | Base | Novel | H    |                  | Base | Novel | H    |                   | Base | Novel | H    |
| CoOp                         | 82.7 | 63.2  | 71.7 | CoOp             | 76.5 | 67.9  | 71.9 | CoOp              | 40.4 | 22.3  | 28.7 |
| CoOp+GPT                     | 82.5 | 72.1  | 76.9 | CoOp+GPT         | 76.3 | 69.6  | 72.8 | CoOp+GPT          | 37.6 | 32.5  | 34.9 |
| CoOp+IDAPL                   | 84.1 | 74.6  | 79.1 | CoOp+IDAPL       | 76.0 | 69.7  | 72.7 | CoOp+IDAPL        | 44.3 | 29.1  | 35.1 |
|                              | +1.6 | +2.5  | +2.1 |                  | -0.3 | 0.1   | -0.1 |                   | +6.7 | -3.4  | +0.3 |
| MaPLe                        | 82.3 | 75.1  | 78.5 | MaPLe            | 76.7 | 70.5  | 73.5 | MaPLe             | 37.4 | 35.6  | 36.5 |
| MaPLe+GPT                    | 82.2 | 76.6  | 79.3 | MaPLe+GPT        | 76.3 | 71.0  | 73.6 | MaPLe+GPT         | 37.8 | 37.1  | 37.4 |
| MaPLe+IDAPL                  | 84.2 | 77.7  | 80.8 | MaPLe+IDAPL      | 76.8 | 70.8  | 73.7 | MaPLe+IDAPL       | 44.0 | 35.9  | 39.6 |
|                              | +2.0 | +1.1  | +1.5 |                  | +0.5 | -0.3  | +0.1 |                   | +6.2 | -1.2  | +2.1 |
| (d) Food101                  |      |       |      | (e) Caltech101   |      |       |      | (f) Flowers102    |      |       |      |
|                              | Base | Novel | H    |                  | Base | Novel | H    |                   | Base | Novel | H    |
| CoOp                         | 88.3 | 82.3  | 85.2 | CoOp             | 98.0 | 89.8  | 93.7 | CoOp              | 97.6 | 59.7  | 74.1 |
| CoOp+GPT                     | 90.6 | 90.6  | 90.6 | CoOp+GPT         | 98.0 | 95.9  | 96.9 | CoOp+GPT          | 96.4 | 72.8  | 83.0 |
| CoOp+IDAPL                   | 89.9 | 91.9  | 90.9 | CoOp+IDAPL       | 98.5 | 95.2  | 96.8 | CoOp+IDAPL        | 98.1 | 77.1  | 86.3 |
|                              | -0.7 | +1.3  | +0.3 |                  | +0.5 | -0.7  | -0.1 |                   | +1.7 | +4.3  | +3.4 |
| MaPLe                        | 90.7 | 92.1  | 91.4 | MaPLe            | 97.7 | 94.4  | 96.0 | MaPLe             | 95.9 | 72.5  | 82.6 |
| MaPLe+GPT                    | 90.9 | 91.9  | 91.4 | MaPLe+GPT        | 98.5 | 95.9  | 97.1 | MaPLe+GPT         | 95.3 | 74.5  | 83.7 |
| MaPLe+IDAPL                  | 90.9 | 92.1  | 91.5 | MaPLe+IDAPL      | 97.8 | 94.2  | 96.0 | MaPLe+IDAPL       | 96.7 | 76.4  | 85.3 |
|                              | 0.0  | +0.2  | +0.1 |                  | -0.7 | -1.6  | -1.2 |                   | +1.4 | +1.8  | +1.7 |
| (g) OxfordPets               |      |       |      | (h) StanfordCars |      |       |      | (i) SUN397        |      |       |      |
|                              | Base | Novel | H    |                  | Base | Novel | H    |                   | Base | Novel | H    |
| CoOp                         | 93.7 | 95.3  | 94.5 | CoOp             | 78.1 | 60.4  | 68.1 | CoOp              | 80.6 | 65.9  | 72.5 |
| CoOp+GPT                     | 95.6 | 97.0  | 96.3 | CoOp+GPT         | 76.7 | 74.4  | 75.5 | CoOp+GPT          | 81.3 | 74.0  | 77.5 |
| CoOp+IDAPL                   | 94.8 | 97.3  | 96.0 | CoOp+IDAPL       | 81.7 | 75.9  | 78.7 | CoOp+IDAPL        | 81.9 | 79.5  | 80.7 |
|                              | -0.8 | +0.3  | -0.3 |                  | +5.0 | +1.5  | +3.2 |                   | +0.6 | +5.5  | +3.2 |
| MaPLe                        | 95.4 | 97.8  | 96.6 | MaPLe            | 72.9 | 74.0  | 73.5 | MaPLe             | 80.8 | 78.7  | 79.7 |
| MaPLe+GPT                    | 95.5 | 97.7  | 96.6 | MaPLe+GPT        | 71.4 | 73.5  | 72.4 | MaPLe+GPT         | 80.7 | 78.9  | 79.8 |
| MaPLe+IDAPL                  | 95.5 | 97.7  | 96.6 | MaPLe+IDAPL      | 80.8 | 75.5  | 78.1 | MaPLe+IDAPL       | 81.9 | 79.5  | 80.7 |
|                              | 0.0  | 0.0   | 0.0  |                  | +9.4 | +2.1  | +5.6 |                   | +1.2 | +0.6  | +0.9 |
| (j) DTD                      |      |       |      | (k) EuroSAT      |      |       |      | (l) UCF101        |      |       |      |
|                              | Base | Novel | H    |                  | Base | Novel | H    |                   | Base | Novel | H    |
| CoOp                         | 79.4 | 41.2  | 54.2 | CoOp             | 92.2 | 54.7  | 68.7 | CoOp              | 84.7 | 56.1  | 67.5 |
| CoOp+GPT                     | 82.6 | 51.9  | 63.7 | CoOp+GPT         | 87.5 | 64.5  | 74.3 | CoOp+GPT          | 84.6 | 70.1  | 76.7 |
| CoOp+IDAPL                   | 83.8 | 62.0  | 71.3 | CoOp+IDAPL       | 90.9 | 64.7  | 75.6 | CoOp+IDAPL        | 85.3 | 78.7  | 81.9 |
|                              | +1.2 | +10.1 | +7.5 |                  | +3.4 | +0.2  | +1.3 |                   | +0.7 | +8.6  | +5.2 |
| MaPLe                        | 80.4 | 59.2  | 68.2 | MaPLe            | 94.1 | 73.2  | 82.4 | MaPLe             | 83.0 | 78.7  | 80.8 |
| MaPLe+GPT                    | 81.6 | 60.6  | 69.6 | MaPLe+GPT        | 93.4 | 81.4  | 87.0 | MaPLe+GPT         | 83.0 | 79.7  | 81.3 |
| MaPLe+IDAPL                  | 83.4 | 65.3  | 73.3 | MaPLe+IDAPL      | 93.9 | 85.8  | 89.7 | MaPLe+IDAPL       | 84.4 | 81.4  | 82.9 |
|                              | +1.8 | +4.7  | +3.7 |                  | +0.5 | +4.4  | +2.7 |                   | +1.4 | +1.7  | +1.6 |

## References

- [1] Muhammad Uzair Khattak, Hanoona Abdul Rasheed, Muhammad Maaz, Salman H. Khan, and Fahad Shahbaz Khan. 2023. MaPLe: Multi-modal Prompt Learning. In *CVPR*. 19113–19122.
- [2] Mayug Maniparambil, Chris Vorster, Derek Molloy, Noel Murphy, Kevin McGuinness, and Noel E. O'Connor. 2023. Enhancing CLIP with GPT-4: Harnessing Visual Descriptions as Prompts. In *ICCV*. 262–271.
- [3] Shuvendu Roy and Ali Etemad. 2023. Consistency-guided Prompt Learning for Vision-Language Models. *CoRR* abs/2306.01195 (2023). <https://doi.org/10.48550/ARXIV.2306.01195> arXiv:2306.01195
- [4] Kaiyang Zhou, Jingkang Yang, Chen Change Loy, and Ziwei Liu. 2022. Conditional Prompt Learning for Vision-Language Models. In *CVPR*. 16795–16804.
